# Supplementary material for: Non-additive genome-wide association scan reveals a new gene associated with habitual coffee consumption
Source: PubMed Central journal article supplement (PMC4997959; doi:10.1038/srep31590), 2016-08-25
Supplement: srep31590-s1.pdf [file srep31590-s1.pdf]

# Non-additive genome-wide association scan reveals a new gene associated with habitual coffee consumption

Nicola Pirastu<sup>1,2,3\*</sup>, Maarten Kooyman<sup>4</sup>, Antonietta Robino<sup>1</sup>, Ashley van der Spek<sup>4</sup>, Luciano Navarini<sup>7</sup>, Najaf Amin<sup>4</sup>, Lennart C. Karssen<sup>4,6</sup>, Cornelia Van Duijn<sup>4,5</sup>, Paolo Gasparini<sup>1,2</sup>.

1. Institute for Maternal and Child Health - IRCCS "Burlo Garofolo", 2. University of Trieste, Italy, 3. Usher Institute of Population Health and Informatics, The University of Edinburgh, Edinburgh, UK., 4. Genetic Epidemiology Unit, Department of Epidemiology, Erasmus Medical Center, Rotterdam, the Netherlands, 5. Centre for Medical Systems Biology, Leiden University Medical Center, Leiden, The Netherlands, 6. PolyOmica, Groningen, The Netherlands, 7. illycaffè s.p.a, Trieste, Italy.

Additional Tables.

Table S1. Cohort summary information

|           | N    | Age mean(sd) | % Man | Coffee consumption cups/day mean (sd) |
|-----------|------|--------------|-------|---------------------------------------|
| INGI-CARL | 370  | 46 (16)      | 41.9  | 1.9 (1.6)                             |
| INGI-FVG  | 843  | 47.5 (14.8)  | 41.5  | 2.3(1.6)                              |
| ERF       | 1713 | 47.5 (12.8)  | 46.5  | 5.8 (3.6)                             |

Table S2. Summary information for each GWAS performed in the discovery step.

|           | Model     | N. SNPs | $\lambda$ |
|-----------|-----------|---------|-----------|
| INGI-FVG  | additive  | 6476444 | 1         |
|           | dominant  | 7049692 | 1.01      |
|           | recessive | 3692733 | 1         |
| INGI-CARL | additive  | 9114185 | 0.99      |
|           | dominant  | 9022767 | 0.99      |
|           | recessive | 5413630 | 1.02      |

Table S.3 Kendall Tau between the association pattern of coffee and the eQTL pattern in each of the Gtex database tissue.

| Tissue                        | Kendall $\tau$ |
|-------------------------------|----------------|
| Adipose Subcutaneous          | -0.27          |
| Artery Aorta                  | -0.44          |
| Artery Tibial                 | -0.55          |
| Cells Transformed fibroblasts | -0.38          |
| Esophagus Mucosa              | -0.61          |
| Esophagus Muscularis          | -0.52          |
| Heart Left Ventricle          | -0.44          |
| Lung                          | -0.52          |
| Muscle Skeletal               | -0.52          |
| Nerve Tibial                  | -0.49          |
| Skin Sun Exposed Lower leg    | -0.32          |
| Stomach                       | -0.43          |
| Thyroid                       | -0.39          |
| Whole Blood                   | -0.32          |
|                               |                |
